# Supplementary material for: The real-time experiences of older people with dementia, informal caregivers and professional caregivers during the transition from home to a nursing home: multiple longitudinal cases
Source: Research Square preprint supplement (doi:10.21203/rs.3.rs-5610694/v1), 2025-04-09
Supplement: Supplementary file 1 [file 52c2f5e0adb054ded167c5d1.docx]

# Appendix 1: General Topic guide: patient journey from home to a nursing home.

**Three general questions asked during every interview**

1. How did you experience the past few weeks?
2. What is currently happening in the transition process?
3. What next steps will be undertaken to facilitate the move?

**Question throughout the transition process**

**Living at Home**

1. What kind of help do you/they currently receive?
   1. How is this assistance provided?
2. How do you view the current home situation?
   1. What is going well?
   2. What is not going well?
3. Was there a moment when you/they started considering a nursing home as an option?
   1. Please describe this moment.
   2. How was the topic of moving introduced?
   3. How did you/they respond?
4. Who is currently responsible for the transition decisions/process?
   1. How is it organized?
   2. How does the current living situation influence your/their decision regarding a nursing home?

**A transition decision/ preparing for the move**

1. How did the conversation about a possible move begin?
   1. Who initiated the discussion, and why?
   2. What was the reason for considering the move?
   3. How was this proposal received?
2. How did previous preparations help or hinder this process?
3. What would you/they need to ensure a smooth and dignified move?
4. How have you/they guided this process?
   1. What has gone well? Why?
   2. What has not gone well? Why?
5. Why did you/they choose this nursing home?
6. How did you/they experience the nursing home visit?
   1. What do you/they think is the value or importance of such a visit?

**The Day of the Move**

1. Can you describe how the day of the move went?
2. Were you involved in packing belongings?
   1. How did that process go for you?
   2. What aspects of it were the most challenging?
3. Did you accompany the person with dementia to the nursing home?
   1. How would you describe that experience?
   2. How would you say everyone involved experienced the day overall?
4. At what point did you have contact with professional caregivers during the process?
   1. Which professionals were involved?

**The Week(s) After the Move**

1. How was your or your loved one’s experience visiting or living in the nursing home during the first week?
   1. What was the atmosphere like?
   2. How would you describe your relationship with the staff?
2. Now that some time has passed since the first week, how would you describe things have been for you or your loved one?
3. What kind of information was shared with you about the nursing home?
   1. Was it sufficient, and how helpful was it?
4. How has living in the nursing home impacted daily life or routines?
   1. Have hobbies or routines continued, and how?
5. How would you describe the communication and relationship with the staff/family?
6. Has it been possible to feel at home in the new environment?
   1. What steps were taken to make people feel more like home?
7. Are you still in contact with home care staff?
   1. In what ways do you maintain this contact?
8. Is there a designated contact person for you at the nursing home?
   1. Who is this person, and how would you describe your interactions with them?

**Final Questions**

1. What do you see as the biggest challenge and the greatest success in this transition process so far?
   1. What steps could be taken to improve the experience?
2. How has your participation in this research impacted the transition process?
