# Supplementary material for: The real-time experiences of older people with dementia, informal caregivers and professional caregivers during the transition from home to a nursing home: multiple longitudinal cases
Source: Research Square preprint supplement (doi:10.21203/rs.3.rs-5610694/v1), 2025-04-09
Supplement: Supplementary file 2 [file c14cb8d794e53b3d2ac1b42f.docx]

**Appendix 2: Examples of personalized interview guides**

**Interview with the case manager dementia before the move**

**Three general questions:**

1. How did you experience the past few weeks?
2. What is currently happening in the transition process?
3. What next steps will be undertaken to facilitate the move?

**Living at Home**

1. How do you view the current home situation of Mr. (name)?
   1. What is going well?
   2. What is going less well?
2. What kind of help does he receive?
   1. How is the assistance going?
   2. Is it sufficient/insufficient?
3. Was there a moment when you started considering a nursing home as an option for this family?
   1. Describe this moment?

**A Transition Decision / Preparing for the Move**

1. What makes it difficult for him to continue living at home?
2. What are your thoughts on moving?
3. Has the move been discussed already?
   1. What do the couple think about the move?
   2. In what context was this conversation?
4. How did the conversation about a possible move start?
   1. Who initiated it and why?
   2. What was the indication?
   3. What would make it easier?
   4. What would hinder this process?
   5. Why did they choose this location?
5. How did it come to be considered?
6. When would a move be necessary?
7. How do you guide this process?
   1. What is going well? Why?
   2. What is going less well? Why?

**Interview with the informal caregiver directly after the move**

**Three general questions:**

1. How did you experience the past few weeks?
2. What is currently happening in the transition process?
3. What next steps will be undertaken to facilitate the move?

**The Day of the Move**

1. How did the day of the move go for you?
2. You were likely at home. How did it feel knowing the move was happening?
3. Did you help pack the belongings?
   1. How did this go?
   2. What was the most difficult part?
4. The children accompanied their father to the care home.
   1. How did this go?
   2. How did your children feel about the move?
   3. How did they experience the day?
5. When did you have contact with the dementia case manager?

**The Week(s) After the Move**

1. Reflecting on the Past Week:
   1. How do you feel the process went?
2. How did the move go?
   1. What story did you tell your husband?
   2. Did you agree with this story? Why or why not?
   3. Who decided on this story?
      1. What was the reasoning behind these decisions?
3. You weren’t present during the move:
   1. What was the reason for this choice?
4. How was your first visit with your husband in the care home?
   1. What was the atmosphere like?
5. Do you have a good relationship with the staff? Why or why not?
6. How did your husband react when he saw you?
   1. How did you feel in that moment?
7. Now that the first week is over, how has it been for you?
8. The dementia case manager will gradually step back from their role. How do you feel about this?
   1. Have you spoken to the case manager recently?
   2. How has this contact been over the past week?
