# Supplementary material for: The real-time experiences of older people with dementia, informal caregivers and professional caregivers during the transition from home to a nursing home: multiple longitudinal cases
Source: Research Square preprint supplement (doi:10.21203/rs.3.rs-5610694/v1), 2025-04-09
Supplement: Supplementary file 3 [file cc6ed21c3e77e1a19f9f2af3.docx]

**Tables**

**Table 1.** Participant characteristics

|  | **Who?** |  | **Age** | **Gender** | **Interviews and follow-up moments** |
| --- | --- | --- | --- | --- | --- |
|  |  | **Case 1** | | | |
|  | Older person (husband) | - **Older persons** were a couple. Both were diagnosed with dementia.   - **The husband** had moderate dementia.   - **His wife** had advanced dementia. She could not participate in the study. - They received home care to aid with activities of daily living and household chores. | 92 | Male | 3 |
|  | Older person (wife) | 86 | Female | She did not participate. |
|  | Informal caregiver (daughter) | - **The primary family caregiver** was the daughter. She and her husband provided support and care. - The daughter also had a brother who was not involved during the transition process. | 57 | Female | 6 |
|  | Dementia case manager | - **The dementia case manager** was involved at the start of the study. - The professional caregivers of the nursing home declined participation. | 62 | Female | 5 |
|  |  | **Case 2** | | | |
|  | Older person (husband) | - **The older person was a husband.** He was diagnosed with dementia. - He was not involved during the study, as he was not informed of the transition decision. - He did not receive care at home. | 82 | Male | He did not participate |
|  | Informal caregiver (wife) | - **The primary caregiver** was the wife of the older person. - They lived together before the move. - They had three children (one daughter, and two sons). | 77 | Female | 10 |
|  | Daughter | - She was involved, but she resides in Belgium, so she has to travel two hours to visit her parents. | 48 | Female | 1 |
|  | Son | - He lived close by and was available whenever his parents needed him. | 52 | Male | 1 |
|  | Dementia case manager | - The **dementia case manager** was involved from the moment of diagnosis. | 55 | Female | 6 |
|  | HCP nursing home  (intake conversation) | - She did the intake conversation with the informal caregiver and the family on the day of the move. | 27 | Female | 1 |
|  | HCP nursing home  (contact person) | - She was the contact person for the family. However, the family still had not spoken with her when the data collection was stopped. | Unknown | Female | 1 |
|  | HCP (waiting list coordinator) | - She was an administrative coordinator of the transitional care process. | 37 | Female | 1 |
|  |  | **Case 3** | | | |
|  | Older person (husband) | - **The older person** was a husband who had Progressive supranuclear palsy and dementia. - He initially experienced mostly physical symptoms. - He mostly had mobility problems and was at risk of falling. | 74 | Male | 5 |
|  | Informal caregiver (wife) | - The **informal caregiver** was the wife. They lived together. - They also had a son and daughter who supported their parents throughout the transition process. | 71 | Female | 6 |
|  | Daughter | - **The daughter** lived further away but was always available when her parents needed her. | 48 | Female | 1 |
|  | Son | - **The son** lived closer and often joined the meetings with the dementia case manager. | 46 | Male | 1 |
|  | Dementia case manager | - The **dementia case manager** had a leading role. She prepared the family for the transition. | 44 | Female | 2 |
|  | HCP (day care) | - She was the coordinator of the day care centre that the older person visited before moving to a nursing home. | 59 | Female | 1 |
|  | HCP  (waiting list coordinator) | - The waiting list coordinator was personally involved in the transition process. She was in contact with the family and had regular phone calls to provide information about the preferred nursing home or their status on the waiting list. | 37 | Female | 2 |
|  | HCP nursing home  (contact person) | - She was the contact person for the family from the moment the older person lived in the nursing home. | 30 | Female | 1 |
|  |  | **Case 4** | | | |
|  | Older person (husband) | - **The older person** was ahusband. - He still lived at home with his wife at the end of the study. - He had dementia and was informed about the transition decision. He had significant physical health problems. - He received home care and went to a day care facility. - He did not participate in the study, as was his wife’s preference. | 84 | Male | He did not participate. |
|  | Informal caregiver (wife) | - The **primary informal caregiver** was the wife of the older person. - She also had physical health problems. | 76 | Female | 4 |
|  | Dementia case manager | - The dementia case manager provided care to the older person and his family. | 50 | Female | 2 |
|  | HCP home care  (care coordinator) | - The home care coordinator helped the older person with the activities of daily living. | 61 | Female | 2 |
|  |  | **Case 5** | | | |
|  | Older person (mother) | - **The older person** was a mother. - She had advanced dementia and was no longer able to communicate. - She resided in the first nursing home until six months before the study. She lived back at home for another six months. - She moved to a new nursing home at the start of the study. | 86 | Female | She did not participate. |
|  | Informal caregiver (daughter) | - **The informal caregivers** were two sisters. - They also had two brothers who were less involved. - They removed the mother from the first nursing home due to dissatisfaction with her care. | 59 | Female | 3 |
|  | Informal caregiver (daughter) | 56 | Female | 3 |
|  | Dementia case manager | - The dementia case manager provided care in the home situation. | 41 | Female | 1 |
|  | HCP (waiting list coordinator) | - The nursing home coordinator provided a picture of the older person’s life at the nursing home. | Unknown | Female | 2 |

**Table 2.** Overview of the transition process per case

End of study or passing away of participant

Day of the move

Phone call, place at preferred nursing home

|  |  | **Time on the waiting list of the preferred nursing home.** | **The week before the move and the day of the move.** | **First weeks after the move.** | **Months after the move.** |
| --- | --- | --- | --- | --- | --- |
| Case 1 |  |
| Older person | - The couple had a preferred nursing home. They were offered a double room. - They only wanted to move if they could live together. - Both were involved in the transition decision. | - The husband was overwhelmed by the news. - The wife was no longer able to understand the transition decision. She was always happy. - The move was a week after the phone call. - At the nursing home, they got a double room so that they could live together. However, this room was on a somatic ward. | - The husband significantly declined after the move. He quickly became wheelchair bound. - He was also not happy at the nursing home. - The wife became incontinent. She seemed happy and could still participate in activities. | - The husband wanted to move back home. He did not feel at home in the nursing home. - However, at home, he would be alone as well. - The husband wanted to die. He asked for and received palliative sedation to end his life. He no longer wanted to live. - The wife died a few days after the husband. Cause unknown. |
| Informal caregiver | - The daughter felt the waiting time was too long due to administrative tasks. - The daughter lost her freedom; she needed to care for her parents 24/7. | - News of the move felt sudden. - The daughter was doubtful about the move: maybe they should keep them at home longer. | - The daughter visited every day. - The daughter was exhausted. The transition had a significant impact on her life. - Decorating the room for her parents was impossible due to restrictions in the nursing home. | - The daughter was dissatisfied with the care provided: mouldy food, dirty clothes, and missed appointments. - She kept questioning the possibility of returning home. |
| Professional caregivers | - The dementia case manager visited the family every six weeks. She arranged for the transition and fixed small problems until the move. - She indicated that she would be present until six weeks after the move. | - Due to miscommunication between the different professional caregivers, information was not always communicated to the older persons and informal caregiver. | - The dementia case manager was no longer involved. - Communication with nursing home staff was challenging. There were constantly different personnel. - They were not used to caring for people with dementia. | - Staff and informal caregivers communicated by writing notes on paper. - Staff were barely present. |
| Case 2 | Older person | - The older person was not interviewed, as he did not know about the transition decision. | - He moved to a preferred nursing home that was a five-minute walk from his residential home. - He attended day care and was then accompanied to the nursing home. | - The older person was shocked on the day of the move. He did not fight the family's choices. - He became very sick shortly after the move. | - His physical and mental health deteriorated significantly. - He also experienced some agitation. |
| Informal caregiver | - The transition felt paradoxical. The wife understood the necessity but did not want to let go. - She planned the transition ahead of time. - She felt like her role changed from wife to caregiver. | - She doubted the transition decision. The call came sooner than expected. - She started preparing for the move. - She called for a “family moment” the week before the move. | - The wife was not involved on the day of the move. She was anxious about the reaction of the older person. - The daughter and son accompanied the father on the day of the move. - The wife was only satisfied if she visited the older person daily. | - She recognized that she was burned out from the caregiving. - She was satisfied with the timing of the move. - She had her life back. - She did not visit him every day. - She had her freedom and hobbies back. |
| Professional caregivers | - The case manager was very proactive. - She initiated advanced care planning. - She communicated with other professional caregivers. | - There was a miscommunication with staff at the nursing home. | - The case manager provided information about the nursing home. - She was not involved on the day of the move as the older person had a good network. | - Nursing home staff communicated with the family through an online system. - They provided the older person with the structure that he did not have at home. - The personnel were friendly and experienced. |
| Case 3 | Older person | - The older person was involved in the transition decision. - He was on the waiting list for a preferred nursing home. - He had mostly physical problems and a speech impediment. - He received home care and day care. | - A crisis unfolded after the older person’s health deteriorated. - He was first moved to an observation centre and later to an available nursing home. - He was not informed about the move due to the urgency and uncertainty of the situation. | - The older person had difficulties accepting the new living situation. - He blamed the informal caregiver for the move and accused her of leaving him behind. - Both his mental and physical health deteriorated significantly. He became wheelchair bound. | - The older person deteriorated significantly within a few days. - He passed away after six months of living in the nursing home. |
| Informal caregiver | - The wife took care of the older person. - Due to the high fall risk, the wife constantly had to watch the older person and she had a high care burden. - The preferred nursing home was across the street. | - The wife could no longer take care of the older person as he showed incomprehensible behaviour. - The informal caregiver and the children guided the older person to the observation centre. - They received the call and had to move within two hours. | - The wife visited the older person every day. - It was a half hour's drive. It left the wife with very little time for herself. - The wife was emotional due to her husband’s incomprehensible behaviour. | - The wife was grateful that the older person passed away without suffering. - They had a lovely goodbye. - She stated that the transition was more difficult than the actual passing away. |
| Professional caregivers | - The case manager proactively prepared the family for the move. - They received care from home care nurses. - The care coordinator of the preferred nursing home kept in contact with the family and answered questions regarding the future home. | - The dementia case manager arranged for the crisis transfer. - The care coordinator of the preferred nursing home kept in contact with the family in case a place became available. | - The staff tried their best to care for the older person. - A significant staff shortage increased the older person’s fall risk. - The family often cared for the other residents when the staff were busy. | - The coordinator of the nursing home made sure the older person passed away peacefully. - They attended the funeral to pay their respects to the family. |
| Case 4 | Older person | - The older person was not involved in the study. - The older person was informed about the transition decision. - He was present when the dementia case manager discussed his care. However, they were unsure if he comprehended everything as he often lost interest during the meeting. - He goes to day care four times a week. | | | |
| Informal caregiver | - The wife took care of the older person. - She also attended a support group for informal caregivers of people with dementia, held every two weeks. - She had difficulties caring for him as she often had to say what he could or could not do. - She did not feel ready for the move to a nursing home. She needed to have the feeling that it was the “right” time. - The son was involved and attended all meetings with the dementia case manager. | | | |
| Professional caregivers | - The dementia case manager recognized the burden on the informal caregiver. - She tried to speed up the transition process, as she was scared it would turn into a crisis. - She provided all the information about the care possibilities but felt the informal caregiver had to make her own decision even though she disagreed. | | | |
| Case 5 | Older person | - She moved into a nursing home close to her daughters. - She was no longer able to communicate and could not participate in the study. | | - She had a request for euthanasia but this was not accepted as she seemed happy despite her diagnosis. | | |
| Informal caregiver | - The transition felt very fast. They had been waiting for six months and received a phone call saying they had to move within two days. - The nursing home allowed them to get used to their mother living there. The informal caregivers could still provide care for their mother. - One daughter worked in healthcare. She had learned all about dementia. | | - The daughters started up a process to get euthanasia for their mother. It was refused. They were very disappointed. - A new resident was making a lot of noise on the ward. The daughters started doubting the nursing home decision. | | |
| Professional caregivers | - The case manager sent information about the older persons' care to the nursing home. - She wanted to call the nursing home herself, as the case was unique. - The case manager explained expectation management to the daughters. It was not one-on-one care like at home. - The nursing home staff also had to address the expectations of the daughters. | | - Nursing home staff communicated with the daughters through electronic records. - There were often difficult moments as the daughters paid attention to every detail of their mother’s care. - The nursing home staff and daughters did not always agree. Staff found the daughters controlling. Daughters liked to do things right for their mother. | | |

**Table 3.** An overview of data collection moments

|  | Oct 2021 | Nov 21 | Dec 21 | | Jan 22 | Feb 22 | Mar 22 | Apr 22 | May 22 | Jun 22 | Jul 22 | Aug 22 | Sep 22 | Oct 22 | Nov 22 | Dec 22 | Jan 23 | | Feb 23 | | Mar 23 |
| --- | --- | --- | --- | --- | --- | --- | --- | --- | --- | --- | --- | --- | --- | --- | --- | --- | --- | --- | --- | --- | --- |
| Case 1 | **Mid** | | | **Post** | | **Weeks after move** | | |  | | | | | | | | | **Post** | |  |  | |
| 20 Oct 21–25 Jan 2022 | **D - D** | **D- DIO - OI** | **I - I** |  | **I - D** | **D** |  | **D - IO** |  | | | | | | | | | **I** | |  |  | |
| # 11 contact moments |  |  | |
| Case 2 |  | **Mid** | | **Post** | | **Weeks after move** | |  |  |  |  |  |  |  |  |  |  | |  | |  |
| 9 Nov 21–29 Apr 22 |  | **D- D - I -DI - D** | **I - D - I - I - I - D** | **D - HN - I** | **D - F - F** | **HN - DI - I - HN** | **D - I - I - I** |  |  |  |  |  |  |  |  |  |  | |  | |  |
| # 25 contact moments |  |  |  |  |  |  |  |  |  |  |  | |  | |  |
| Case 3 |  |  |  |  |  |  |  | **Mid** | | | | | **Post** | | **Weeks after move** | | | | | | |
| 5 Apr 22–21 Mar 23 |  |  |  |  |  |  |  | **D - D** | **IO** | **IO** | **IO - IO - I** | **D - D - D - HH** | **HN-HN** | **IO** |  | **F-F** |  | | **HN** | | **I** |
| # 11 contact moments |  |  |  |  |  |  |  |
| Case 4 |  |  |  |  |  |  |  | **Mid** |  |  |  |  |  |  |  |  |  | |  | |  |
| 7 Apr 22–24 Nov 22 |  |  |  |  |  |  |  | **HH** | **HH** | **D** | **I** |  | **I** | **I- D** | **I** |  |  | |  | |  |
| # 8 contact moments |  |  |  |  |  |  |  |  |  | |  | |  |
| Case 5 |  |  |  |  |  |  | **Mid** | **Post** | | **Weeks after move** | | | |  | | | | | | | |
| 23 Mar 22–16 Sep 22 |  |  |  |  |  |  | **D - D** | **D** |  | **I** | **IC - HN** |  | **I - HN** |  | | | | | | | |
| # 8 contact moments |  |  |  |  |  |  |

| Legend | | | | | | | |
| --- | --- | --- | --- | --- | --- | --- | --- |
| Pre-transition |  |  |  |  |  |  |  |
| Mid-transition |  |  |  |  |  |  |  |
| Post-transition |  |  |  |  |  |  |  |
| Weeks after the move |  |  |  |  |  |  |  |
| **F** | Family |  |  | **O** | Older person | |  |
| **D** | Dementia case manager | |  | **HH** | HCP homecare | |  |
| **I** | Primary informal caregiver | | | **HN** | HCP nursing home | |  |
| **­** | Time between conversations |  |  | **X** | Moved to a nursing home | | |
